# Supplementary material for: Interspecies protein-protein interaction network construction for characterization of host-pathogen interactions: a Candida albicans-zebrafish interaction study
Source: PubMed Central journal article supplement (PMC3751520; doi:10.1186/1752-0509-7-79), 2013-08-16

**Additional file 2 for  
Interspecies protein-protein interaction network construction  
for characterization of host-pathogen interactions: a *Candida  
albicans*-zebrafish interaction study**

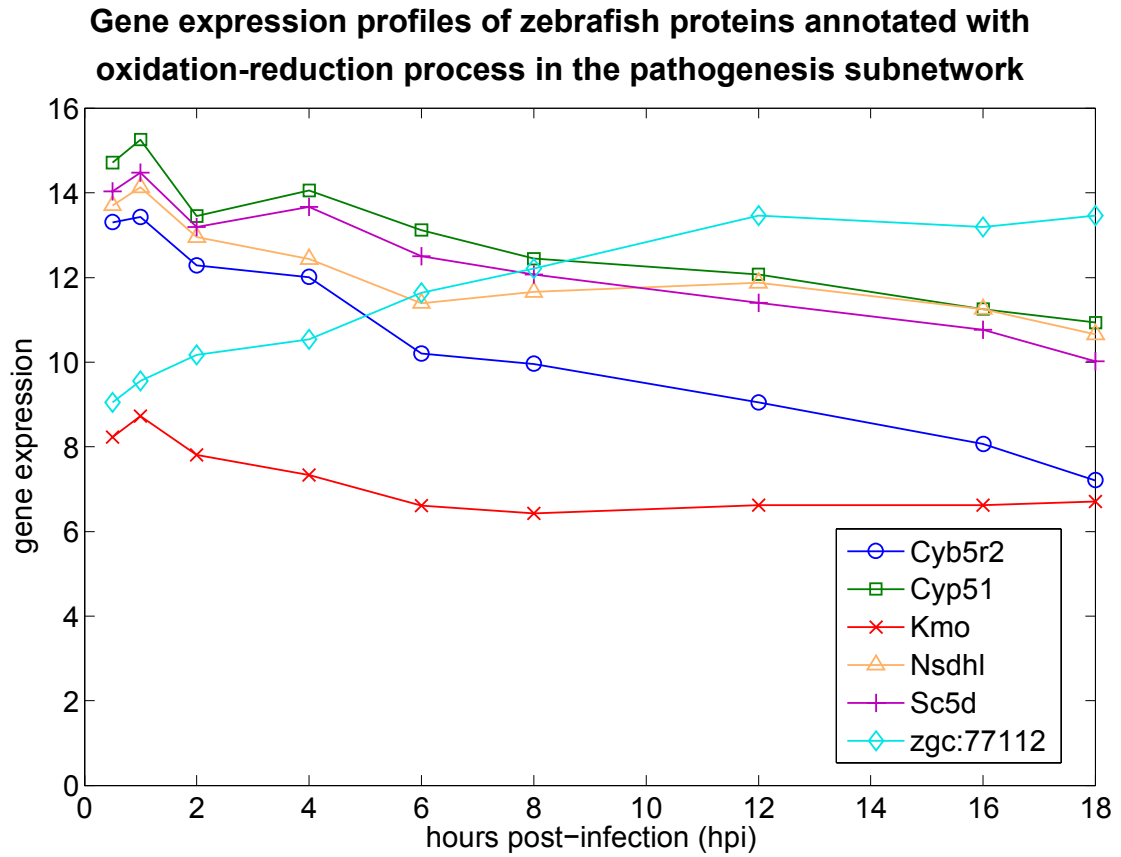

Supplement: 1752-0509-7-79-S2.pdf [file 1752-0509-7-79-S2.pdf]
