# Supplementary material for: Interspecies protein-protein interaction network construction for characterization of host-pathogen interactions: a Candida albicans-zebrafish interaction study
Source: Springer Nature journal article supplement (doi:10.1186/1752-0509-7-79), 2013-08-16

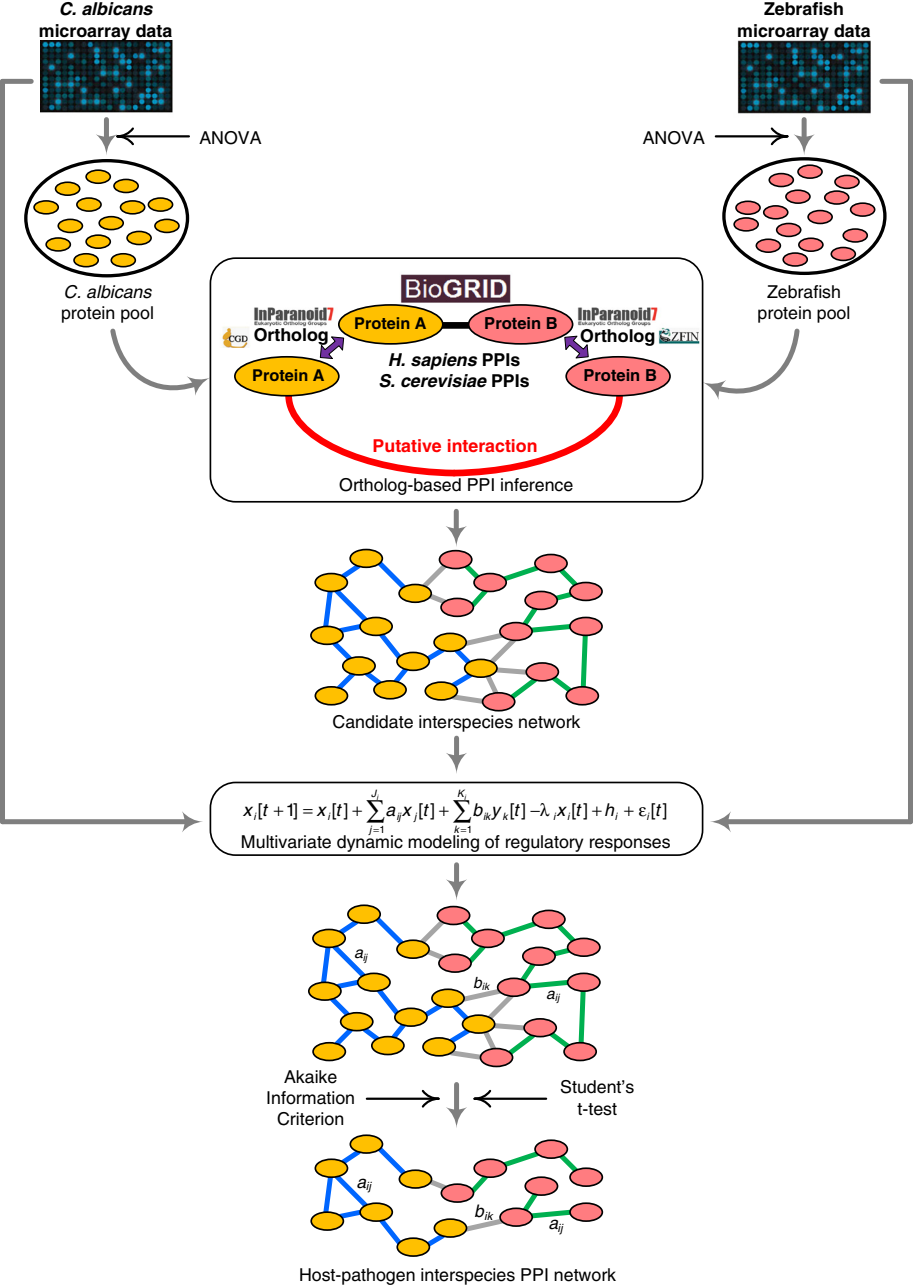

Supplement: 12918_2013_1131_MOESM3_ESM.pdf [file 12918_2013_1131_MOESM3_ESM.pdf]
